# Supplementary material for: Different Types of Hypericum perforatum cvs. (Elixir, Helos, Topas) In Vitro Cultures: A Rich Source of Bioactive Metabolites and Biological Activities of Biomass Extracts
Source: MDPI journal article supplement (doi:10.3390/molecules28052376), 2023-03-04

**Figure S1.** Free radical scavenging activity (DPPH test) of the methanol extracts obtained from biomass of *in vitro* agitated cultures of the *H. perforatum* cultivars Helos, Elixir, and Topas (MS, 0.1 mg/L BAP and 0.1 mg/L NAA, 5 weeks). Values are expressed as the mean  $\pm$  SD (n = 3).

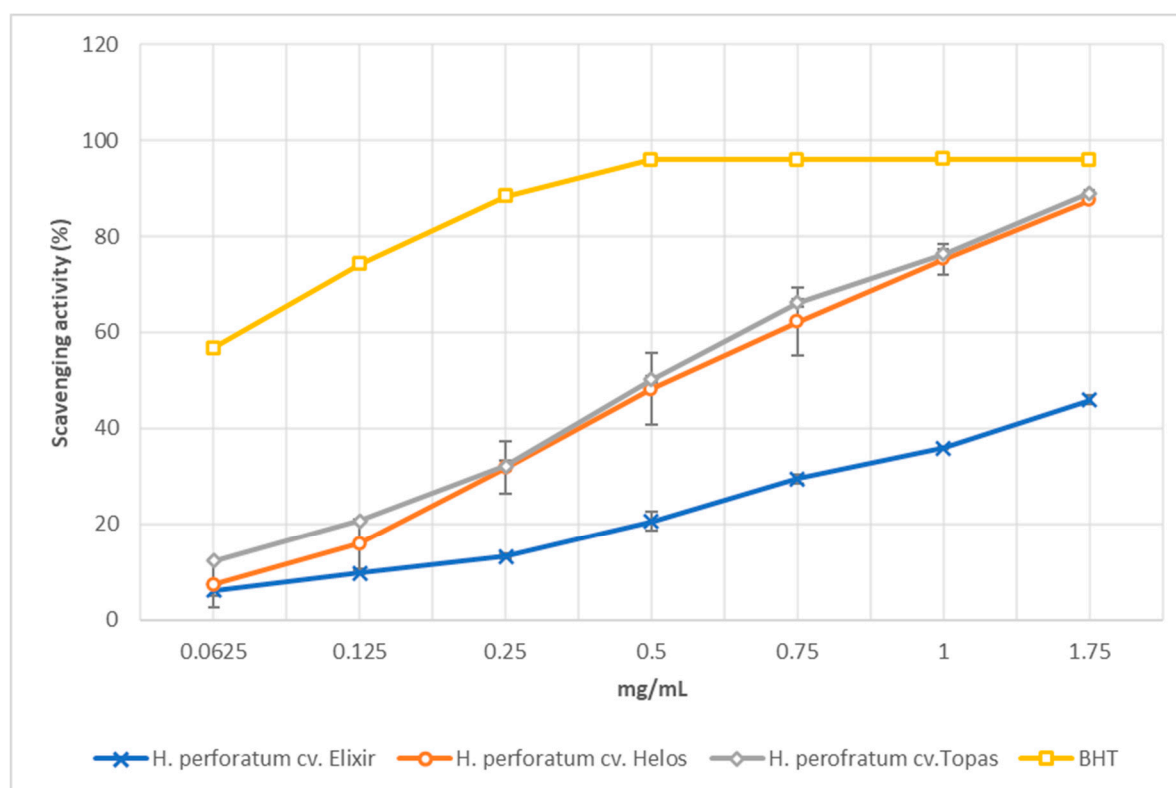

**Figure S2.** Reducing power of the methanol extracts obtained from biomass of *in vitro* agitated cultures of the *H. perforatum* cultivars Helos, Elixir, and Topas (MS, 0.1 mg/L BAP and 0.1 mg/L NAA, 5 weeks), evaluated by spectrophotometric detection based on the  $\text{Fe}^{3+}$ - $\text{Fe}^{2+}$  transformation method. Values are expressed as the mean  $\pm$  SD (n = 3).

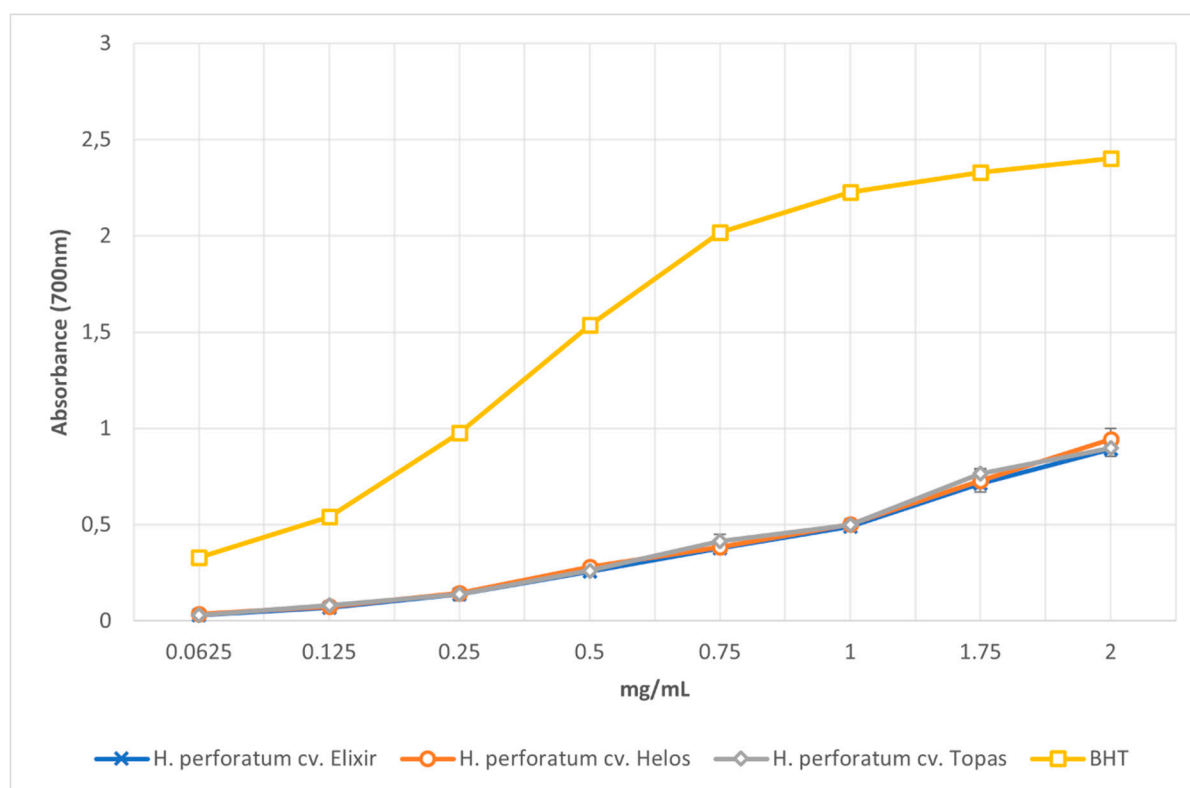

**Figure S3.** The chelating activity of the methanol extracts obtained from biomass of *in vitro* agitated cultures of the *H. perforatum* cultivars Helos, Elixir, and Topas (MS, 0.1 mg/L BAP and 0.1 mg/L NAA, 5 weeks), measured by inhibition of ferrozine-Fe<sup>2+</sup> complex formation. Values are expressed as the mean  $\pm$  SD (n = 3).

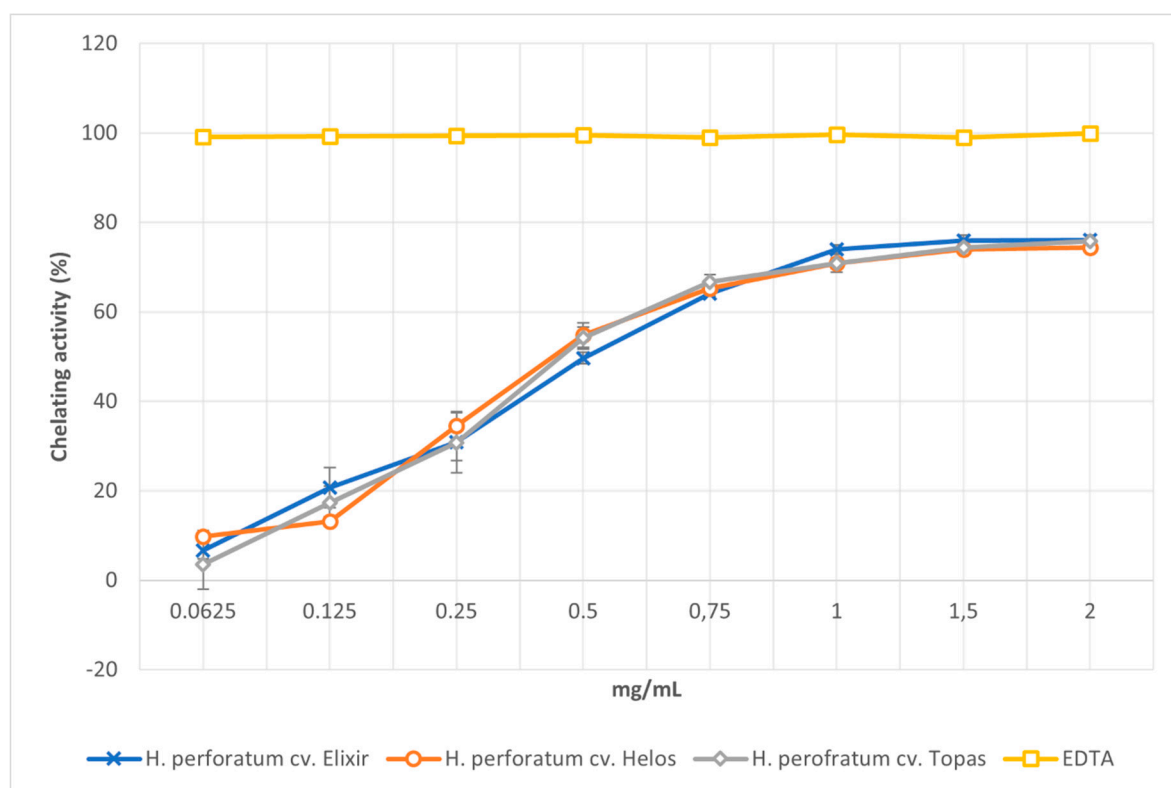

Supplement: s1 [file s1]
